# Supplementary material for: Solid-state structural elucidation and electrochemical analysis of uranyl naphthylsalophen
Source: Royal Society of Chemistry journal article supplement (doi:10.1039/c8cc05242e), 2018-01-01
Supplement: c8cc05242e1.pdf [file c8cc05242e1.pdf]

## Supplemental Information

### **Solid-state structural elucidation and electrochemical analysis of uranyl naphthylsalophen**

Julie E. Niklas,<sup>a</sup> Emily E. Hardy,<sup>a</sup> and Anne E. V. Gorden\*<sup>a</sup>

Department of Chemistry and Biochemistry, Auburn University, 179 Chemistry Building,  
Auburn, Alabama 36849, USA.

#### **Table of Contents**

|                         |     |
|-------------------------|-----|
| Scheme S1               | S2  |
| Electronic Spectroscopy |     |
| UV Vis Spectra          | S2  |
| Additional X-Ray Images | S3  |
| Electrochemical Data    | S5  |
| Experimental Details    | S7  |
| Crystallographic Tables | S11 |

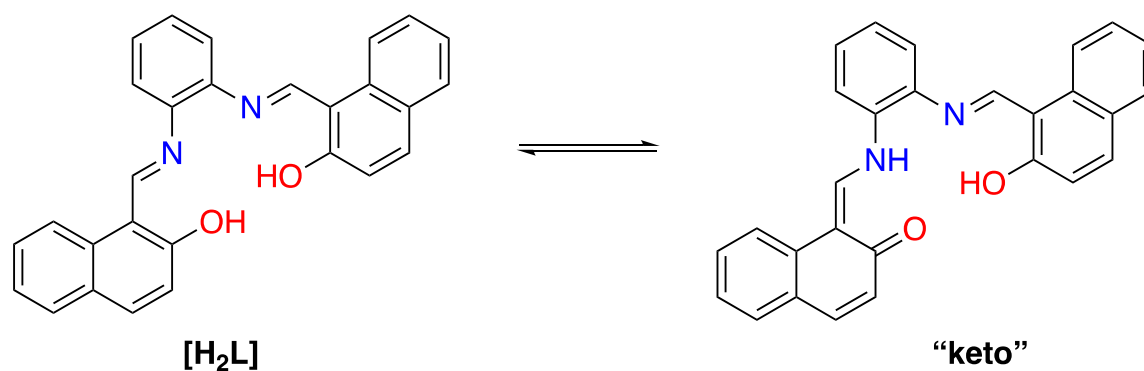

**Scheme S1.** Projection of the “enolimine” and “ketoamine” tautomers of [H<sub>2</sub>L]. The solution phase data and metal complexes suggest the equilibrium lies on the “enolimine” form, but the solid-state data is the “ketoamine” form.

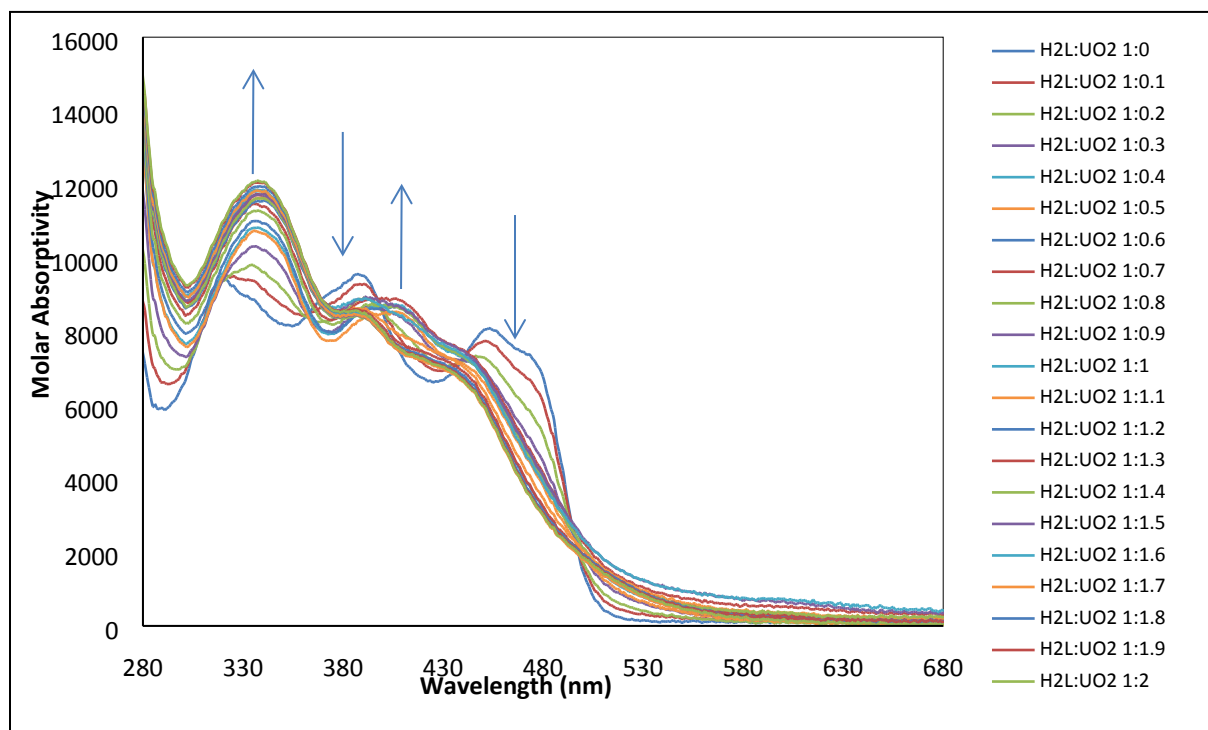

**Figure S1.** Serial titration of 31  $\mu\text{M}$  solution of  $\text{H}_2\text{L}$  in MeOH with increasing ratios of  $\text{UO}_2(\text{NO}_3)_2 \cdot 6\text{H}_2\text{O}$  dissolved in water. Change in the UV spectrum plateaued after a 1:1 addition of metal salt. Minimal water was added through this titration ( $\sim 100 \mu\text{L}$ ) in 2.5 mL of MeOH.

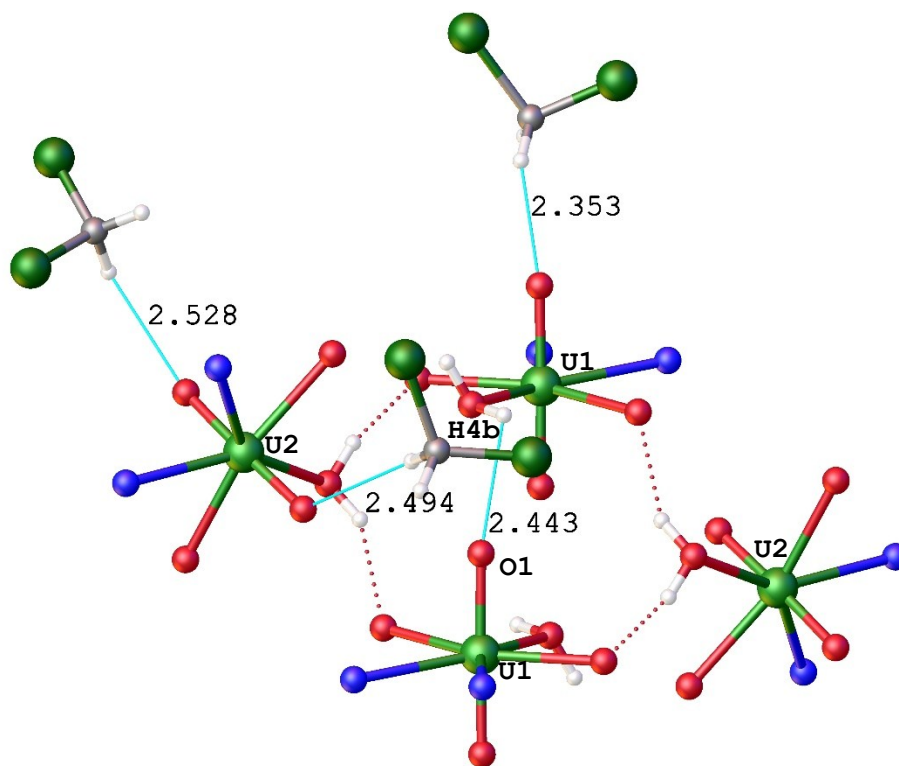

**Figure S2.** Coordination spheres and -yl oxo distances to hydrogen atoms on coordinated H<sub>2</sub>O and interstitial CH<sub>2</sub>Cl<sub>2</sub>. All ligand carbon and hydrogen atoms omitted for clarity.

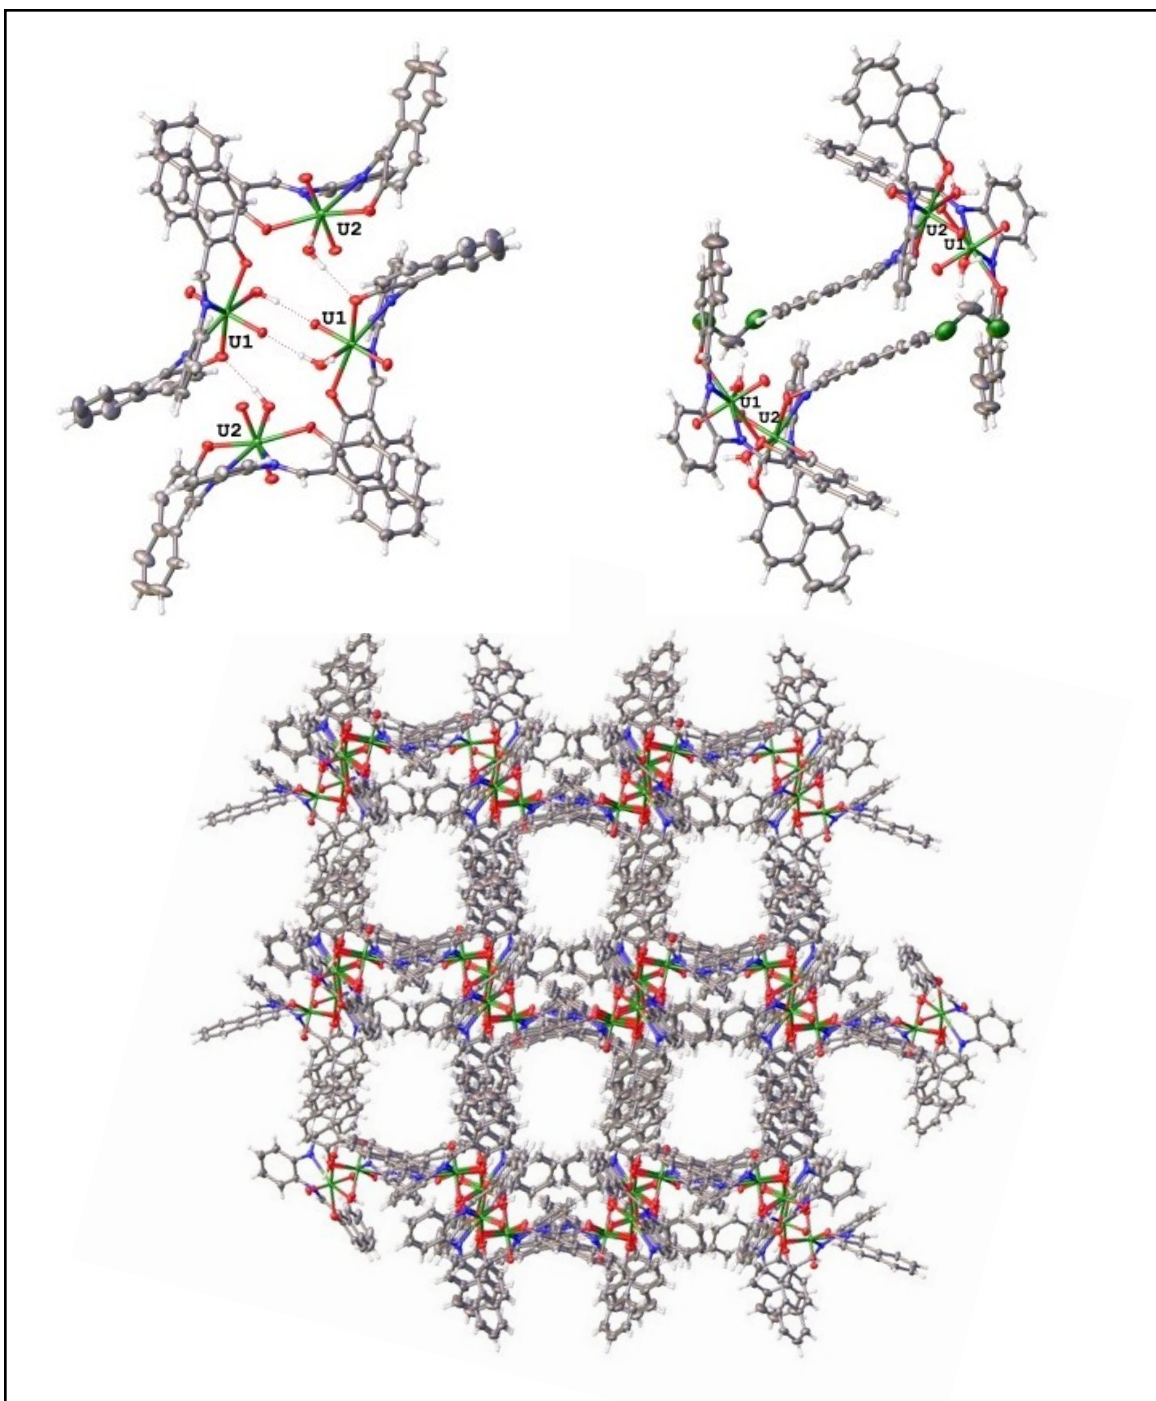

**Figure S3.** Projections of the  $\text{UO}_2[\text{L}]$  complex highlighting the hydrogen bonded tetramers and  $\pi$ - $\pi$  stacking interactions resulting in an interesting supramolecular structure. Interstitial dichloromethane molecules have been removed for clarity.

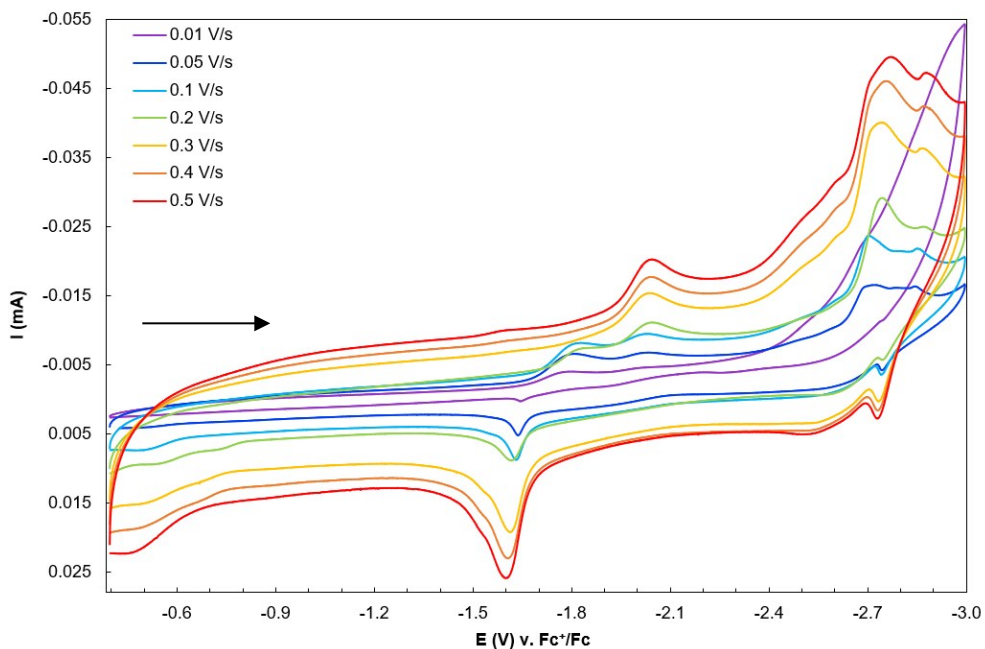

**Figure S4.** Cyclic voltammograms of  $[H_2L]$  (0.25 mM in  $CH_3CN$ , 0.1M  $TBAClO_4$ ) at scan rates of 0.01 V/s – 0.5 V/s.

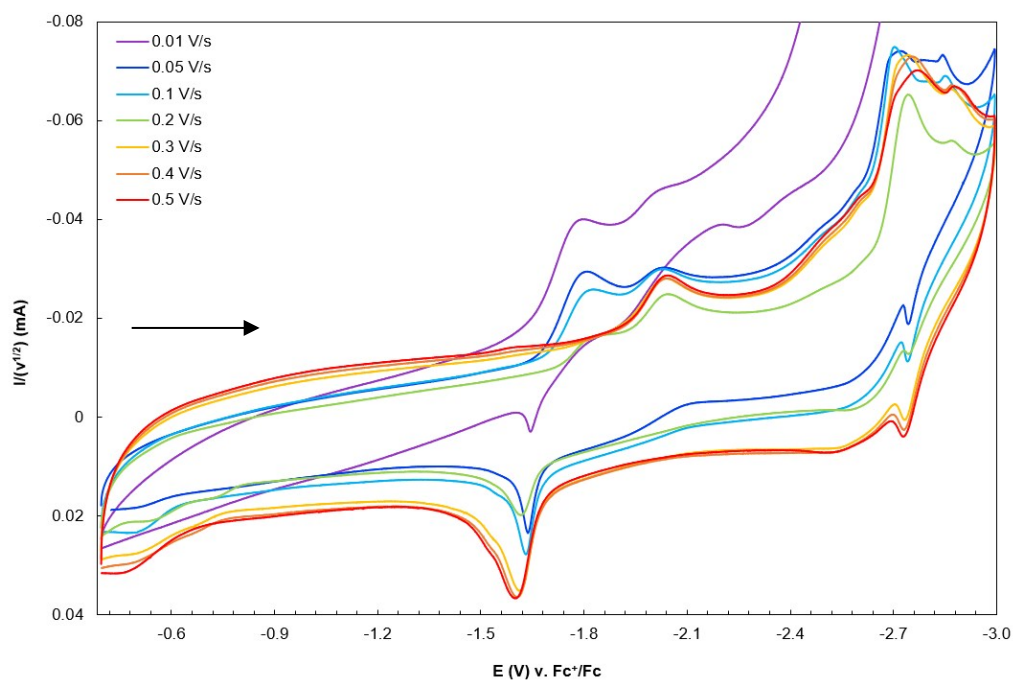

**Figure S5.** Scan rate normalized cyclic voltammograms of  $[H_2L]$  (0.25 mM in  $CH_3CN$ , 0.1M  $TBAClO_4$ ) at scan rates of 0.01 V/s – 0.5 V/s.  $((1000) * (I/v^{1/2}))$ ;  $I$  = current (A),  $v$  = scan rate (V/s).

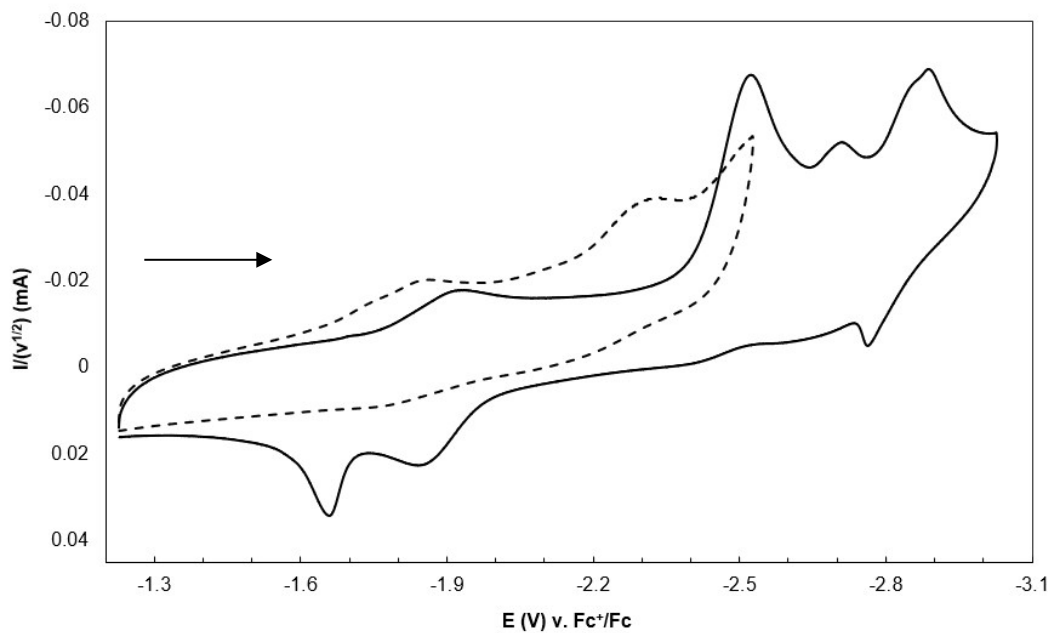

**Figure S6.** Scan-rate normalized cyclic voltammograms of  $\text{UO}_2[\text{L}]$  between -1.2 and -3.0 V (solid, original scan rate 0.2 V/s), and -1.2 and -2.5 V (dashed, original scan rate 0.1 V/s).  $((1000) \cdot (I/v^{1/2}); I = \text{current (A)}, v = \text{scan rate (V/s)}$ .

## Experimental Details

*Caution! Standard precautions for handling radioactive materials or heavy metals, such as  $\text{UO}_2(\text{NO}_3)_4 \cdot 6\text{H}_2\text{O}$  as used in this study, were followed.*

Any solvents not specifically identified were ACS grade, purchased from EMD, and used as received without further purification. The reagents acetonitrile (99.9%, HPLC grade, BDH), 1,2-diaminobenzene (99.5%, Aldrich), 2-hydroxynaphthaldehyde (98%, Alfa Aesar), were used as received without further purification.  $\text{UO}_2(\text{NO}_3)_2 \cdot 6\text{H}_2\text{O}$  (98%, J. T. Baker) was recrystallized from a 50% nitric acid solution and stored under hexanes until use. Anhydrous dichloromethane (BDH) was purchased, stored under argon, and dispensed from a solvent purification system. Triethylamine (99%, Alfa Aesar) was distilled and stored under argon until use.  $(\text{CD}_3)_2\text{SO}$  and  $\text{CDCl}_3$  were purchased from Cambridge Isotope Laboratories and stored in a desiccator.

**[H<sub>2</sub>L]:** 1,2-diaminobenzene (0.433 g, 7.23 mmol) and 2-hydroxynaphthaldehyde (1.32 g, 15.0 mmol) were added to 150 mL of MeOH, and stirred for 6 hours at reflux temperature, during which time the color changed from yellow to dark orange and a precipitate formed. The solution was allowed to cool to room temperature, and the solid was filtered and washed with hexanes to yield a bright orange powder (2.54 g, 84%). <sup>1</sup>H NMR (600 MHz,  $\text{CDCl}_3$ )  $\delta$  7.18 (d, 2H, J = 9.2 Hz), 7.34 (t, 2H, J = 7.4 Hz), 7.44-7.39 (m, 4H), 7.51 (t, 2H, J = 8.2 Hz), 7.73 (d, 2H, J = 7.9 Hz), 7.82 (d, 2H, J = 9.2 Hz), 8.14 (d, 2H, J = 8.5 Hz), 9.46 (d, 2H, J = 3.6 Hz), 15.08 (s, 2OH); <sup>13</sup>C NMR (151 MHz,  $\text{CDCl}_3$ )  $\delta$  109.40, 119.03, 119.15, 122.09, 123.63, 127.42, 127.51, 128.08, 129.41, 133.21, 136.67, 139.73, 156.17, 169.08; TOF MS (ESI) m/z ( $\text{M}^+ + 1$ ) Calcd 417.1525, Found 417.1550. CCDC: 1523762.

**UO<sub>2</sub>[L]:** The naphthylsalophen ligand [H<sub>2</sub>L] (970. mg, 2.33 mmol) and NEt<sub>3</sub> (1 mL) were added to 40 mL of DCM and 20 mL of MeOH in a 100 mL round bottom flask. The mixture was stirred until all the solids were dissolved. Uranyl nitrate hexahydrate (963 mg, 2.27 mmol) was then added to the flask. The reaction was heated to 40 °C and heated with stirring for 2 hours. The solution volume was reduced by half by rotary evaporation, and subsequently put in ice for 30 minutes. A red solid precipitated, and was filtered off and rinsed with hexanes (132 mg, 83%). Crystals suitable for x-ray diffraction were grown in 3 days from layering a saturated DCM solution of UO<sub>2</sub>[L] with hexanes. The <sup>1</sup>H NMR (600 MHz, *d*<sub>6</sub>-DMSO) δ 7.31 (t, 2H, *J* = 7.4 Hz), 7.38 (d, 2H, *J* = 9.1 Hz), 7.53-7.55 (m, 4H), 7.85-7.88 (m, 4H), 8.20 (d, 2H, *J* = 8.1 Hz), 8.36 (d, 2H, *J* = 8.5 Hz), 10.20 (s, 2H) ppm; <sup>13</sup>C NMR (151 MHz, *d*<sub>6</sub>-DMSO) δ 114.72, 120.33, 121.36, 122.92, 124.20, 127.03, 127.91, 128.49, 128.75, 134.49, 137.12, 147.38, 160.09, 171.33 ppm; TOF MS (ESI) *m/z* (*M*<sup>+</sup> + 1) Calcd 685.1774, Found 685.1777, (*M*(H<sub>2</sub>O)<sup>+</sup> + 1) Calcd 703.1880, Found 703.1902. CCDC: 1827293.

## NMR Spectroscopy

<sup>1</sup>H NMR spectra were recorded with a Bruker spectrometer at 600 MHz. <sup>13</sup>C NMR spectra were recorded with a Bruker spectrometer at 151 MHz. NMR spectroscopic data were collected using deuterated chloroform (CDCl<sub>3</sub>) or deuterated DMSO (*D*<sub>6</sub>-DMSO). Chemical shifts are reported in parts per million (δ) and are referenced against TMS or residual internal solvent signals.



## Single Crystal X-ray Diffraction

Crystals suitable for single crystal X-ray diffraction were selected and mounted on a glass fiber using Paratone-N oil and data set collection was completed on a 'Bruker APEX CCD' diffractometer using Mo K $\alpha$  radiation. The crystal was kept at 180 K during unit cell and data collection. SMART (v. 5.624) was used for preliminary determination of cell constants and data collection control. Determination of integrated intensities and global cell refinement were performed with the Bruker SAINT software package, and empirical absorption correction (SADABS) was applied. The structures were solved with the ShelXS structure solution program using Direct Methods<sup>1,2</sup> and refined with the olex2.refine refinement package using Gauss-Newton minimisation.<sup>3,4</sup> Projections were created on Olex2.1.<sup>3</sup>

## Absorbance Spectroscopy

All solution phase absorbance spectra were collected on a VARIAN Cary 50 WinUV Spectrometer with a xenon lamp with absorbance spectra from 200 nm to 900 nm with a 1 cm path length quartz cuvette. Serial titrations were completed by introducing a known amount of the metal salt ( $\text{UO}_2(\text{NO}_3)_2$  in  $\text{H}_2\text{O}$ ) to a solution of the free base ligand  $[\text{H}_2\text{L}]$  in MeOH. A solution of uranyl nitrate ( $\text{UO}_2(\text{NO}_3)_2$  in  $\text{H}_2\text{O}$ ) was prepared by dissolving 3.0 mg of recrystallized uranyl nitrate in water, and then bringing this to volume in a 25.0 mL volumetric flask. Titrations were completed in MeOH by serial additions of 20  $\mu\text{L}$  of the (0.24 mM) uranyl nitrate aqueous solution, maintaining less than 1% water in MeOH. The solutions were agitated for 5 seconds, the cuvette replaced in the spectrometer, and the absorbance spectrum collected. This procedure was repeated until a large excess of metal salt was present. A control series to observe any

absorption change upon of water addition was also conducted, and no significant change was observed. The absorbance was adjusted for concentration by this serial dilution method by the reporting the data as extinction coefficient.

### **Electrochemical Analysis**

Electrochemical measurements were carried out using a CH Instruments 660 E potentiostat in HPLC-grade MeCN or (BDH Chemicals) with tetrabutylammonium perchlorate (TBAClO<sub>4</sub>) supporting electrolyte (0.1 M). Ligand and complex solutions (0.25 mM) were purged with N<sub>2</sub> for 30 minutes immediately prior to experiments. A three-electrode cell consisting of a glassy-carbon-disk working electrode, Pt-wire counter electrode, and Ag/AgCl/saturated KCl/H<sub>2</sub>O reference electrode was used. Data were corrected to versus ferrocene based on averaged values for E<sub>1/2</sub>(Fc<sup>+</sup>/Fc) collected using the same three-electrode cell before and after each set of experiments. All data reported was using an initial cathodic sweep and anodic return sweep.

# Crystallographic Tables

## [H<sub>2</sub>L]

**Table S1** Crystal data and structure refinement for [H<sub>2</sub>L]

|                                             |                                                                               |
|---------------------------------------------|-------------------------------------------------------------------------------|
| Empirical formula                           | C <sub>29</sub> H <sub>22</sub> Cl <sub>2</sub> N <sub>2</sub> O <sub>2</sub> |
| Formula weight                              | 501.42                                                                        |
| Temperature/K                               | 180.45                                                                        |
| Crystal system                              | orthorhombic                                                                  |
| Space group                                 | P2 <sub>1</sub> 2 <sub>1</sub> 2 <sub>1</sub>                                 |
| a/Å                                         | 7.1378(10)                                                                    |
| b/Å                                         | 16.682(2)                                                                     |
| c/Å                                         | 20.056(3)                                                                     |
| α/°                                         | 90                                                                            |
| β/°                                         | 90                                                                            |
| γ/°                                         | 90                                                                            |
| Volume/Å <sup>3</sup>                       | 2388.1(6)                                                                     |
| Z                                           | 4                                                                             |
| ρ <sub>calc</sub> /mg/mm <sup>3</sup>       | 1.3945                                                                        |
| m/mm <sup>-1</sup>                          | 0.303                                                                         |
| F(000)                                      | 1041.6                                                                        |
| Crystal size/mm <sup>3</sup>                | 0.15 × 0.03 × 0.02                                                            |
| Radiation                                   | Mo Kα (λ = 0.71073)                                                           |
| 2θ range for data collection                | 4.06 to 57.4°                                                                 |
| Index ranges                                | -9 ≤ h ≤ 9, -22 ≤ k ≤ 22, -27 ≤ l ≤ 22                                        |
| Reflections collected                       | 17603                                                                         |
| Independent reflections                     | 6177 [R <sub>int</sub> = 0.0539, R <sub>sigma</sub> = 0.0733]                 |
| Data/restraints/parameters                  | 6177/0/318                                                                    |
| Goodness-of-fit on F <sup>2</sup>           | 1.036                                                                         |
| Final R indexes [I ≥ 2σ (I)]                | R <sub>1</sub> = 0.0556, wR <sub>2</sub> = 0.1167                             |
| Final R indexes [all data]                  | R <sub>1</sub> = 0.0869, wR <sub>2</sub> = 0.1284                             |
| Largest diff. peak/hole / e Å <sup>-3</sup> | 0.65/-0.64                                                                    |
| Flack parameter                             | -0.10(7)                                                                      |

**Table S2** Bond Lengths for [H<sub>2</sub>L].

| Atom | Atom | Length/Å | Atom | Atom | Length/Å |
|------|------|----------|------|------|----------|
| Cl1  | C29  | 1.747(3) | C17  | C16  | 1.392(3) |
| Cl2  | C29  | 1.755(3) | C18  | C19  | 1.438(3) |
| O1   | C1   | 1.276(3) | C19  | C20  | 1.453(3) |

|     |     |          |     |     |          |
|-----|-----|----------|-----|-----|----------|
| O2  | C28 | 1.338(3) | C19 | C28 | 1.395(3) |
| N1  | C11 | 1.319(3) | C20 | C25 | 1.416(3) |
| N1  | C12 | 1.405(3) | C20 | C21 | 1.423(3) |
| N2  | C17 | 1.419(3) | C25 | C24 | 1.419(4) |
| N2  | C18 | 1.302(3) | C25 | C26 | 1.412(4) |
| C6  | C5  | 1.369(4) | C24 | C23 | 1.367(4) |
| C6  | C7  | 1.392(4) | C23 | C22 | 1.396(4) |
| C5  | C4  | 1.424(3) | C3  | C2  | 1.341(4) |
| C4  | C9  | 1.405(3) | C2  | C1  | 1.446(4) |
| C4  | C3  | 1.433(4) | C8  | C7  | 1.376(3) |
| C9  | C10 | 1.455(3) | C13 | C14 | 1.380(3) |
| C9  | C8  | 1.414(4) | C14 | C15 | 1.391(4) |
| C10 | C11 | 1.394(3) | C15 | C16 | 1.381(4) |
| C10 | C1  | 1.440(4) | C26 | C27 | 1.359(4) |
| C12 | C17 | 1.407(3) | C27 | C28 | 1.407(4) |
| C12 | C13 | 1.393(3) | C22 | C21 | 1.362(3) |

**Table S3** Bond Angles for [H<sub>2</sub>L].

| Atom | Atom | Atom | Angle/°    | Atom | Atom | Atom | Angle/°  |
|------|------|------|------------|------|------|------|----------|
| C12  | N1   | C11  | 127.3(2)   | C21  | C20  | C25  | 117.7(2) |
| C18  | N2   | C17  | 118.05(19) | C24  | C25  | C20  | 119.4(2) |
| C7   | C6   | C5   | 119.0(2)   | C26  | C25  | C20  | 119.4(2) |
| C4   | C5   | C6   | 120.9(2)   | C26  | C25  | C24  | 121.2(2) |
| C9   | C4   | C5   | 120.0(2)   | C23  | C24  | C25  | 121.0(3) |
| C3   | C4   | C5   | 120.2(2)   | C22  | C23  | C24  | 119.7(3) |

|     |     |     |          |     |     |     |            |
|-----|-----|-----|----------|-----|-----|-----|------------|
| C3  | C4  | C9  | 119.8(2) | C2  | C3  | C4  | 121.4(2)   |
| C10 | C9  | C4  | 119.4(2) | C1  | C2  | C3  | 122.0(3)   |
| C8  | C9  | C4  | 117.4(2) | C10 | C1  | O1  | 122.6(2)   |
| C8  | C9  | C10 | 123.2(2) | C2  | C1  | O1  | 119.6(2)   |
| C11 | C10 | C9  | 121.2(2) | C2  | C1  | C10 | 117.7(2)   |
| C1  | C10 | C9  | 119.6(2) | C7  | C8  | C9  | 121.2(2)   |
| C1  | C10 | C11 | 119.2(2) | C8  | C7  | C6  | 121.3(3)   |
| C10 | C11 | N1  | 123.9(2) | C14 | C13 | C12 | 120.4(2)   |
| C17 | C12 | N1  | 118.0(2) | C15 | C14 | C13 | 120.4(2)   |
| C13 | C12 | N1  | 122.6(2) | C16 | C15 | C14 | 119.6(2)   |
| C13 | C12 | C17 | 119.4(2) | C15 | C16 | C17 | 120.8(2)   |
| C12 | C17 | N2  | 117.7(2) | C27 | C26 | C25 | 121.6(2)   |
| C16 | C17 | N2  | 123.0(2) | C28 | C27 | C26 | 120.2(2)   |
| C16 | C17 | C12 | 119.3(2) | C19 | C28 | O2  | 122.1(2)   |
| C19 | C18 | N2  | 122.5(2) | C27 | C28 | O2  | 116.7(2)   |
| C20 | C19 | C18 | 121.1(2) | C27 | C28 | C19 | 121.3(2)   |
| C28 | C19 | C18 | 120.3(2) | C21 | C22 | C23 | 121.0(3)   |
| C28 | C19 | C20 | 118.6(2) | C22 | C21 | C20 | 121.2(3)   |
| C25 | C20 | C19 | 119.0(2) | C12 | C29 | C11 | 111.72(16) |
| C21 | C20 | C19 | 123.3(2) |     |     |     |            |

**Table S4** Hydrogen Bonds for [H<sub>2</sub>L].

| D  | H  | A  | d(D-H)/Å | d(H-A)/Å | d(D-A)/Å | D-H-A/° |
|----|----|----|----------|----------|----------|---------|
| O2 | H2 | N2 | 0.80(3)  | 1.82(3)  | 2.574(3) | 156(3)  |

## UO<sub>2</sub>[L]

**Table S5** Crystal data and structure refinement for UO<sub>2</sub>[L]

|                   |                                                                                               |
|-------------------|-----------------------------------------------------------------------------------------------|
| Empirical formula | C <sub>60</sub> H <sub>48</sub> Cl <sub>8</sub> N <sub>4</sub> O <sub>10</sub> U <sub>2</sub> |
| Formula weight    | 1744.75                                                                                       |
| Temperature/K     | 180.0                                                                                         |
| Crystal system    | monoclinic                                                                                    |
| Space group       | P2 <sub>1</sub> /n                                                                            |
| a/Å               | 15.4659(12)                                                                                   |
| b/Å               | 19.3294(14)                                                                                   |
| c/Å               | 22.2346(16)                                                                                   |

|                                               |                                                                    |
|-----------------------------------------------|--------------------------------------------------------------------|
| $\alpha/^\circ$                               | 90                                                                 |
| $\beta/^\circ$                                | 106.655(1)                                                         |
| $\gamma/^\circ$                               | 90                                                                 |
| Volume/ $\text{\AA}^3$                        | 6368.1(8)                                                          |
| Z                                             | 4                                                                  |
| $\rho_{\text{calc}}/\text{mg}/\text{mm}^3$    | 1.8197                                                             |
| $\text{m}/\text{mm}^{-1}$                     | 5.476                                                              |
| F(000)                                        | 3269.1                                                             |
| Crystal size/ $\text{mm}^3$                   | $0.18 \times 0.12 \times 0.1$                                      |
| Radiation                                     | Mo K $\alpha$ ( $\lambda = 0.71073$ )                              |
| 2 $\Theta$ range for data collection          | 2.84 to 51.52 $^\circ$                                             |
| Index ranges                                  | $-18 \leq h \leq 18$ , $-23 \leq k \leq 23$ , $-27 \leq l \leq 27$ |
| Reflections collected                         | 74217                                                              |
| Independent reflections                       | 12168 [ $R_{\text{int}} = 0.0706$ , $R_{\text{sigma}} = 0.0463$ ]  |
| Data/restraints/parameters                    | 12168/0/759                                                        |
| Goodness-of-fit on $F^2$                      | 1.094                                                              |
| Final R indexes [ $I \geq 2\sigma(I)$ ]       | $R_1 = 0.0440$ , $wR_2 = 0.0935$                                   |
| Final R indexes [all data]                    | $R_1 = 0.0628$ , $wR_2 = 0.1031$                                   |
| Largest diff. peak/hole / $\text{e \AA}^{-3}$ | 3.33/-1.96                                                         |

**Table S6** Bond Lengths for  $\text{UO}_2[\text{L}]$ .

| Atom | Atom | Length/ $\text{\AA}$ | Atom | Atom | Length/ $\text{\AA}$ |
|------|------|----------------------|------|------|----------------------|
| U1   | O1   | 1.795(5)             | C22  | C23  | 1.408(13)            |
| U1   | O2   | 2.285(5)             | C22  | C27  | 1.414(13)            |
| U1   | O3   | 1.771(5)             | C23  | C24  | 1.393(14)            |
| U1   | O4   | 2.424(5)             | C24  | C25  | 1.396(17)            |
| U1   | N1   | 2.491(6)             | C25  | C26  | 1.368(18)            |
| U1   | N2   | 2.516(6)             | C26  | C27  | 1.415(14)            |
| U1   | O1aa | 2.288(5)             | C27  | C28  | 1.418(14)            |
| U2   | O5   | 2.259(5)             | C28  | C29  | 1.357(12)            |
| U2   | O6   | 2.466(5)             | C31  | C32  | 1.420(10)            |
| U2   | O8   | 1.769(5)             | C31  | C36  | 1.419(11)            |
| U2   | N3   | 2.538(6)             | C31  | O0aa | 1.315(8)             |
| U2   | N4   | 2.515(6)             | C32  | C33  | 1.445(10)            |
| U2   | O0aa | 2.311(5)             | C32  | C41  | 1.431(11)            |

|     |      |           |      |       |           |
|-----|------|-----------|------|-------|-----------|
| U2  | O3aa | 1.771(5)  | C33  | C34   | 1.407(11) |
| O2  | C1   | 1.330(9)  | C33  | C40   | 1.418(10) |
| O5  | C46  | 1.315(10) | C34  | C35   | 1.430(11) |
| N1  | C3   | 1.290(10) | C34  | C37   | 1.415(11) |
| N1  | C4   | 1.428(9)  | C35  | C36   | 1.344(11) |
| N2  | C5   | 1.428(10) | C37  | C38   | 1.360(12) |
| N2  | C6   | 1.307(10) | C38  | C39   | 1.377(13) |
| N3  | C41  | 1.282(9)  | C39  | C40   | 1.373(11) |
| N3  | C42  | 1.425(10) | C42  | C43   | 1.404(11) |
| N4  | C43  | 1.424(10) | C42  | C58   | 1.396(11) |
| N4  | C44  | 1.294(10) | C43  | C55   | 1.390(11) |
| C1  | C2   | 1.397(11) | C44  | C45   | 1.424(12) |
| C1  | C29  | 1.422(11) | C45  | C46   | 1.403(11) |
| C2  | C3   | 1.454(11) | C45  | C50   | 1.452(12) |
| C2  | C22  | 1.433(11) | C46  | C47   | 1.428(11) |
| C4  | C5   | 1.390(11) | C47  | C48   | 1.366(13) |
| C4  | C21  | 1.409(10) | C48  | C49   | 1.411(14) |
| C5  | C18  | 1.396(11) | C49  | C50   | 1.412(13) |
| C6  | C7   | 1.437(11) | C49  | C54   | 1.418(14) |
| C7  | C8   | 1.400(11) | C50  | C51   | 1.399(13) |
| C7  | C12  | 1.455(11) | C51  | C52   | 1.370(14) |
| C8  | C9   | 1.412(10) | C52  | C53   | 1.384(16) |
| C8  | O1aa | 1.324(9)  | C53  | C54   | 1.342(16) |
| C9  | C10  | 1.360(11) | C55  | C56   | 1.380(13) |
| C10 | C11  | 1.404(12) | C56  | C57   | 1.392(13) |
| C11 | C12  | 1.411(12) | C57  | C58   | 1.389(12) |
| C11 | C16  | 1.410(12) | Cl7  | Cl1aa | 1.66(2)   |
| C12 | C13  | 1.404(12) | Cl8  | Cl1aa | 1.74(2)   |
| C13 | C14  | 1.376(14) | Cl9  | C0aa  | 1.675(16) |
| C14 | C15  | 1.379(15) | Cl10 | C0aa  | 1.760(19) |
| C15 | C16  | 1.346(14) | Cl1  | C3aa  | 1.665(19) |
| C18 | C19  | 1.393(12) | Cl2  | C3aa  | 1.781(17) |
| C19 | C20  | 1.373(13) | Cl6  | C2aa  | 1.65(2)   |
| C20 | C21  | 1.392(12) | Cl0a | C2aa  | 1.87(3)   |

**Table S7** Bond Angles for UO<sub>2</sub>[L].

| Atom | Atom | Atom | Angle/°    | Atom | Atom | Atom | Angle/°   |
|------|------|------|------------|------|------|------|-----------|
| O2   | U1   | O1   | 86.4(2)    | C16  | C11  | C10  | 121.7(8)  |
| O3   | U1   | O1   | 178.5(2)   | C16  | C11  | C12  | 119.5(8)  |
| O3   | U1   | O2   | 95.1(2)    | C11  | C12  | C7   | 118.8(7)  |
| O4   | U1   | O1   | 92.4(2)    | C13  | C12  | C7   | 124.4(8)  |
| O4   | U1   | O2   | 78.29(17)  | C13  | C12  | C11  | 116.8(8)  |
| O4   | U1   | O3   | 88.0(2)    | C14  | C13  | C12  | 121.0(10) |
| N1   | U1   | O1   | 95.2(2)    | C15  | C14  | C13  | 122.2(10) |
| N1   | U1   | O2   | 69.53(19)  | C16  | C15  | C14  | 117.8(9)  |
| N1   | U1   | O3   | 85.3(2)    | C15  | C16  | C11  | 122.7(10) |
| N1   | U1   | O4   | 146.34(19) | C19  | C18  | C5   | 119.0(9)  |
| N2   | U1   | O1   | 91.1(2)    | C20  | C19  | C18  | 120.6(8)  |
| N2   | U1   | O2   | 132.69(19) | C21  | C20  | C19  | 121.8(8)  |
| N2   | U1   | O3   | 87.8(2)    | C20  | C21  | C4   | 117.5(8)  |
| N2   | U1   | O4   | 148.99(19) | C23  | C22  | C2   | 122.4(8)  |
| N2   | U1   | N1   | 63.7(2)    | C27  | C22  | C2   | 119.2(8)  |
| O1aa | U1   | O1   | 88.7(2)    | C27  | C22  | C23  | 118.1(8)  |
| O1aa | U1   | O2   | 157.47(18) | C24  | C23  | C22  | 120.7(11) |
| O1aa | U1   | O3   | 89.9(2)    | C25  | C24  | C23  | 120.1(11) |
| O1aa | U1   | O4   | 79.95(17)  | C26  | C25  | C24  | 120.7(11) |



|      |    |      |            |      |     |     |           |
|------|----|------|------------|------|-----|-----|-----------|
| O1aa | U1 | N1   | 132.88(19) | C27  | C26 | C25 | 119.9(11) |
| O1aa | U1 | N2   | 69.34(19)  | C26  | C27 | C22 | 120.4(10) |
| O6   | U2 | O5   | 79.84(18)  | C28  | C27 | C22 | 118.7(8)  |
| O8   | U2 | O5   | 92.0(2)    | C28  | C27 | C26 | 120.8(10) |
| O8   | U2 | O6   | 91.7(2)    | C29  | C28 | C27 | 122.2(8)  |
| N3   | U2 | O5   | 131.93(19) | C28  | C29 | C1  | 119.6(8)  |
| N3   | U2 | O6   | 148.02(18) | C36  | C31 | C32 | 119.4(6)  |
| N3   | U2 | O8   | 90.7(2)    | O0aa | C31 | C32 | 121.9(7)  |
| N4   | U2 | O5   | 68.63(19)  | O0aa | C31 | C36 | 118.7(6)  |
| N4   | U2 | O6   | 148.43(19) | C33  | C32 | C31 | 118.8(7)  |
| N4   | U2 | O8   | 87.9(2)    | C41  | C32 | C31 | 120.7(7)  |
| N4   | U2 | N3   | 63.5(2)    | C41  | C32 | C33 | 120.2(7)  |
| O0aa | U2 | O5   | 158.85(18) | C34  | C33 | C32 | 120.1(7)  |
| O0aa | U2 | O6   | 79.01(17)  | C40  | C33 | C32 | 123.1(7)  |
| O0aa | U2 | O8   | 88.7(2)    | C40  | C33 | C34 | 116.9(7)  |
| O0aa | U2 | N3   | 69.17(18)  | C35  | C34 | C33 | 118.6(7)  |
| O0aa | U2 | N4   | 132.51(18) | C37  | C34 | C33 | 120.3(7)  |
| O3aa | U2 | O5   | 90.1(2)    | C37  | C34 | C35 | 121.0(8)  |
| O3aa | U2 | O6   | 89.0(2)    | C36  | C35 | C34 | 121.8(7)  |
| O3aa | U2 | O8   | 177.8(2)   | C35  | C36 | C31 | 121.3(7)  |
| O3aa | U2 | N3   | 87.5(2)    | C38  | C37 | C34 | 120.6(8)  |
| O3aa | U2 | N4   | 92.5(2)    | C39  | C38 | C37 | 119.9(8)  |
| O3aa | U2 | O0aa | 89.5(2)    | C40  | C39 | C38 | 121.1(8)  |
| C1   | O2 | U1   | 124.3(4)   | C39  | C40 | C33 | 121.2(8)  |
| C46  | O5 | U2   | 128.7(5)   | C32  | C41 | N3  | 127.9(7)  |
| C3   | N1 | U1   | 123.5(5)   | C43  | C42 | N3  | 116.7(7)  |
| C4   | N1 | U1   | 115.3(5)   | C58  | C42 | N3  | 123.8(7)  |
| C4   | N1 | C3   | 121.1(6)   | C58  | C42 | C43 | 119.5(7)  |
| C5   | N2 | U1   | 114.7(5)   | C42  | C43 | N4  | 115.6(7)  |
| C6   | N2 | U1   | 127.3(5)   | C55  | C43 | N4  | 125.0(7)  |
| C6   | N2 | C5   | 117.8(6)   | C55  | C43 | C42 | 119.4(8)  |
| C41  | N3 | U2   | 127.5(5)   | C45  | C44 | N4  | 126.2(7)  |
| C42  | N3 | U2   | 113.9(4)   | C46  | C45 | C44 | 120.1(8)  |
| C42  | N3 | C41  | 118.5(6)   | C50  | C45 | C44 | 119.9(7)  |
| C43  | N4 | U2   | 115.9(5)   | C50  | C45 | C46 | 119.5(8)  |
| C44  | N4 | U2   | 124.8(5)   | C45  | C46 | O5  | 122.0(7)  |
| C44  | N4 | C43  | 119.2(7)   | C47  | C46 | O5  | 118.2(7)  |
| C2   | C1 | O2   | 122.2(7)   | C47  | C46 | C45 | 119.7(8)  |
| C29  | C1 | O2   | 117.6(7)   | C48  | C47 | C46 | 120.0(8)  |
| C29  | C1 | C2   | 120.1(7)   | C49  | C48 | C47 | 122.3(9)  |
| C3   | C2 | C1   | 119.9(7)   | C50  | C49 | C48 | 119.1(9)  |
| C22  | C2 | C1   | 119.7(7)   | C54  | C49 | C48 | 121.4(9)  |
| C22  | C2 | C3   | 120.0(7)   | C54  | C49 | C50 | 119.4(9)  |
| C2   | C3 | N1   | 125.2(7)   | C49  | C50 | C45 | 119.2(8)  |
| C5   | C4 | N1   | 116.5(7)   | C51  | C50 | C45 | 123.2(9)  |

|      |     |     |          |      |      |     |           |
|------|-----|-----|----------|------|------|-----|-----------|
| C21  | C4  | N1  | 122.4(7) | C51  | C50  | C49 | 117.6(9)  |
| C21  | C4  | C5  | 121.1(7) | C52  | C51  | C50 | 120.7(10) |
| C4   | C5  | N2  | 115.4(7) | C53  | C52  | C51 | 121.8(11) |
| C18  | C5  | N2  | 124.5(7) | C54  | C53  | C52 | 119.0(11) |
| C18  | C5  | C4  | 120.0(7) | C53  | C54  | C49 | 121.5(10) |
| C7   | C6  | N2  | 124.8(7) | C56  | C55  | C43 | 121.4(8)  |
| C8   | C7  | C6  | 121.5(7) | C57  | C56  | C55 | 118.9(8)  |
| C12  | C7  | C6  | 118.7(7) | C58  | C57  | C56 | 121.0(9)  |
| C12  | C7  | C8  | 119.6(7) | C57  | C58  | C42 | 119.8(8)  |
| C9   | C8  | C7  | 119.9(7) | C31  | O0aa | U2  | 132.0(5)  |
| O1aa | C8  | C7  | 122.3(7) | C8   | O1aa | U1  | 128.6(4)  |
| O1aa | C8  | C9  | 117.8(7) | Cl10 | C0aa | Cl9 | 110.8(9)  |
| C10  | C9  | C8  | 120.0(8) | Cl8  | C1aa | Cl7 | 114.9(12) |
| C11  | C10 | C9  | 122.8(8) | Cl0a | C2aa | Cl6 | 101.1(9)  |
| C12  | C11 | C10 | 118.8(7) | Cl2  | C3aa | Cl1 | 114.3(8)  |

## References

1. Bruker Bruker AXS Inc.: Madison, Wisconsin, USA, 2001.
2. Sheldrick, G. M., *Acta Crystallogr., Sect. A: Found. Crystallogr.* **2008**, *A64*, 112.
3. Dolomanov, O. V.; Bourhis, L. J.; Gildea, R. J.; Howard, J. A. K.; Puschmann, H., *J. Appl. Cryst.* **2009**, *42*, 339-341.
4. Bourhis, L. J.; Dolomanov, O. V.; Gildea, R. J.; Howard, J. A. K.; Puschmann, H., *Acta Crystallogr.* **2015**, *A71* (1), 59-75.
